# Supplementary material for: Interactive toxicity of non-/biodegradable NPs and butyl methoxydibenzoyl methane on intestinal health and metabolism of zebrafish
Source: Royal Society of Chemistry journal article supplement (doi:10.1039/d5en00083a), 2025-01-01
Supplement: d5en00083a1.pdf [file d5en00083a1.pdf]

## **Interactive toxicity of non-/biodegradable NPs and butyl methoxydibenzoyl methane on intestinal health and metabolism of zebrafish**

**Zhenhua Yan<sup>a</sup>, Jing Xiang<sup>a</sup>, Dao Zhou<sup>b</sup>, Zhuhong Ding<sup>b</sup>, Hengchen Wei<sup>b</sup>, Qijie Jin<sup>b</sup>, Ranran Zhou<sup>b,\*</sup>**

*<sup>a</sup>Key Laboratory of Integrated Regulation and Resources Development on Shallow Lakes of Ministry of Education, Hohai University, Nanjing 210024, China.*

*<sup>b</sup>School of Environmental Science & Engineering, Nanjing Tech University, 30 Puzhu Southern Road, Nanjing 211816, China.*

*\*Corresponding author: Ranran Zhou*

*E-mail address: rrzhou@njtech.edu.cn*

*Tel.: +86-15051812618*

## **Chemicals and reagents**

BD-DBM (purity > 98%, CAS-no. 118-60-5), PLA-NPs and PS-NPs (1000 nm) were purchased from AccuStandard Inc (Newhaven, USA) and Guangxi Chenchen Plasticizing Co., Ltd (Guangxi, China) respectively. BD-DBM stock solutions and serial dilutions were pre-configured in dimethyl sulfoxide (DMSO; purity > 99.9%; Amresco, Solon, USA). PLA-NPs and PS-NPs stock and dilutions were pre-configured in a deionized water solution. Phosphate buffer saline (PBS) was purchased from J&K Scientific (Shanghai, China). 4 % paraformaldehyde solution was purchased from Labgic Technology Co., Ltd (Beijing, China).

## **Quantitative real-time polymerase chain reaction (qRT-PCR) assay**

Two microlitres of original cDNA (diluted 10-fold) were taken out and added into a reaction tube containing 0.1  $\mu$ M primer and 0.25 $\times$ FastStart Universal SYBR GREEN Master (Roche, Germany), making a total volume of 20  $\mu$ L. Expression of target genes was quantified by an Eppendorf main ring EP real-time PCR detection system (Eppendorf, Germany). The quantitative RT-PCR amplification procedures were as follows: the first was a pre-denaturation at 95°C for 3 min, then 40 cycles of denaturation at 95°C for 10 s and annealing and extension at 60°C for 1 min. All reactions were repeated 3 times.

## **Intestinal microbiome analysis**

The highly variable V3-V4 region of bacterial 16S rRNA gene was amplified by PCR thermal cycler, and the primers were upstream primer 338F (5'-ACTCCTACGGGAGGCAGCAG-3') and downstream primer 806R (5'-GGACTACHVGGGTWTCTAAT-3'). The original sequencing sequence was quality-controlled by fastp (0.20.0, <https://github.com/OpenGene/fastp>) software and spliced by FLASH (1.2.7, <http://www.cbcb.umd.edu/software/flash>) software. Then, the sequences were subjected to OTU clustering based on 97% similarity by UPARSE software (7.1, <http://drive5.com/uparse/>). Finally, each OUT representative sequence

was annotated and analyzed for species classification using RDP classifier (2.2, <http://rdp.cme.msu.edu/>) and a confidence threshold (70%) combined with the Silva 16S rRNA database (v138).

### **Metabolomic analysis**

The mass spectrometry data were searched, compared and analyzed against three major mass spectrometry databases: mzCloud, mzVault and MassList. After detection and identification, metabolomics data obtained in positive (833 species) and negative (404 species) ion modes were combined, and orthogonal partial least squares discriminant analysis (OPLS-DA) was performed on the entire sample set. Statistical significance (p-value) was calculated for each metabolite using a t-test to compare the two groups, and the fold change (FC value) of the differences between metabolites in the different groups was calculated. metabolites with  $VIP > 1$ ,  $p < 0.05$ , and  $|\log_2 FC| \geq 1$  were identified as significantly changed metabolites.

**Table 1S.** Primers used for quantitative real-time PCR analysis and their sources. Gene-specific primers of all the genes were designed based on zebrafish sequences available at NCBI (<http://www.ncbi.nlm.nih.gov/>).

| Primer         | Gene ID | Primer (5'-3')                                                          |
|----------------|---------|-------------------------------------------------------------------------|
| <i>β-actin</i> | 57934   | F: 5'-CTGTCTTCCCATCCATCGTGGGTC-3'<br>R: 5'-CTCCATATCATCCCAGTTGGTGACA-3' |
| <i>TNF-α</i>   | 405785  | F: 5'-GCTGGATCTTCAAAGTCGGGTGTA-3'<br>R: 5'-TGTGAGTCTCAGCACACTTCCATC-3'  |
| <i>IL-1β</i>   | 405770  | F: 5'-CATTTGCAGGCCGTCACA-3'<br>R: 5'-GGACATGCTGAAGCGCACTT-3'            |
| <i>IL-10</i>   | 553957  | F: 5'-CCCTATGGATGTCACGTCATG-3'<br>R: 5'-CATATCCCGCTTGAGTTCCTG-3'        |
| <i>PPAR-α</i>  | 563298  | F: 5'-CATCTTGCCTTGCAGACATT-3'<br>R: 5'-CACGCTCACTTTTCATTTCAC-3'         |
| <i>GCK</i>     | 751668  | F: 5'-GCTGTGAAGTCGGCATGATA-3'<br>R: 5'-CTTCAACCAGCTCCACCTTAC-3'         |
| <i>UCP2</i>    | 555812  | F: 5'-TGGCTAACCCACTGATGTA-3'<br>R: 5'-CAATGGTCCGATATGCGTC-3'            |
| <i>SOD</i>     | 30553   | F: 5'-GTCGTCTGGCTTGTGGAGTG-3'<br>R: 5'-TGTCAGCGGGCTAGTGCTT-3'           |
| <i>CAT</i>     | 30068   | F: 5'-CAGGAGCGTTTGGCTACTTC-3'<br>R: 5'-ATCGGTGTCGTCTTTCCAAC-3'          |

**Table 2S.** Alpha diversity in zebrafish intestines after exposure to PLA, PS, B, PLA+B and PS+B.

| Group of exposure | Chao1          | ACE            | Shannon    | Simpson   | Pielou     |
|-------------------|----------------|----------------|------------|-----------|------------|
| CK                | 1302.93±844.06 | 1410±997.30    | 2.28±0.39  | 0.66±0.03 | 0.36±0.02  |
| PLA               | 935.43±134.44  | 1048.74±205.57 | 2.53±0.81  | 0.68±0.19 | 0.38±0.10  |
| PS                | 1352.38±190.42 | 1460.76±186.78 | 3.82±0.35* | 0.90±0.06 | 0.54±0.05* |
| B                 | 899.79±614.96  | 983.82±704.59  | 2.71±0.71  | 0.76±0.14 | 0.42±0.09  |
| PLA+B             | 1487.61±508.90 | 1660.83±494.68 | 3.21±0.31  | 0.84±0.07 | 0.48±0.04  |
| PS+B              | 870.32±281.69  | 961.88±306.11  | 3.45±0.28* | 0.90±0.04 | 0.52±0.02* |

**Table 3S.** OPLS-DA analysis of different metabolites in zebrafish intestines.

| Group of exposure | Upregulated the number of metabolites | Down-regulating the number of metabolites | Total |
|-------------------|---------------------------------------|-------------------------------------------|-------|
| PLA               | 30                                    | 33                                        | 63    |
| PS                | 27                                    | 41                                        | 68    |
| B                 | 48                                    | 35                                        | 83    |
| PLA+B             | 81                                    | 34                                        | 115   |
| PS+B              | 97                                    | 61                                        | 158   |

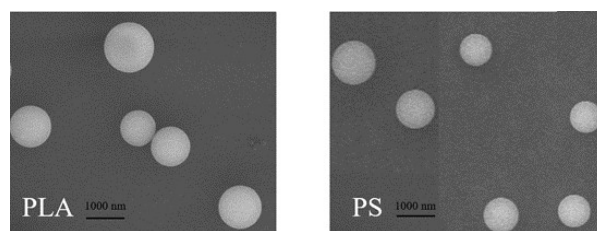

**Fig. 1S.** Scanning electron microscopy of PLA-NPs and PS-NPs.

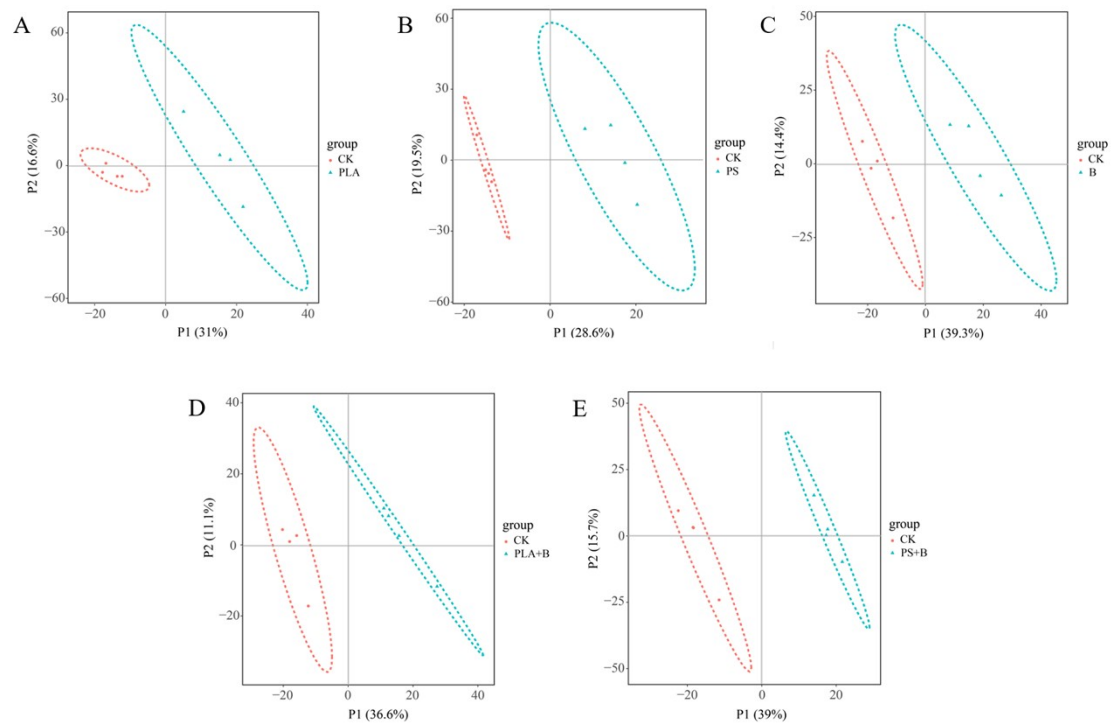

**Fig. 2S.** Sequencing verification of PLS-DA of the metabolome in zebrafish intestines with different concentrations of PLA, PS, B, PLA+B and PS+B treatments.
